# Supplementary material
Source: PubMed Central journal article supplement (PMC2881470)
Supplement: NIHMS207295-supplement-01.pdf [file NIHMS207295-supplement-01.pdf]

## SUPPLEMENTARY ONLINE DATA

# Human haem oxygenase-1 induction by nitro-linoleic acid is mediated by cAMP, AP-1 and E-box response element interactions

Marcienne M. WRIGHT\*†, Junghyun KIM\*‡, Thomas D. HOCK\*†, Norbert LEITINGER§, Bruce A. FREEMAN|| and Anupam AGARWAL\*†<sup>1</sup>

\*Department of Medicine, Nephrology Research and Training Center, University of Alabama at Birmingham, Birmingham, AL 35294, U.S.A., †Department of Biochemistry and Molecular Genetics, University of Alabama at Birmingham, Birmingham, AL 35294, U.S.A., ‡Department of Pathology, University of Alabama at Birmingham, Birmingham, AL 35294, U.S.A., §Department of Pharmacology, University of Virginia, Charlottesville, VA 22908, U.S.A., and ||Department of Pharmacology and Chemical Biology, University of Pittsburgh, Pittsburgh, PA 15213, U.S.A.

**Table S1 Sequences of oligonucleotide primers**

|                             | Oligonucleotides       | Sequence (5'–3')                     |
|-----------------------------|------------------------|--------------------------------------|
| Mouse HO-1                  | Forward                | aggtacacatccaagccgagaa               |
|                             | Reverse                | ctctggacaccctgaccctctg               |
| Mouse GAPDH                 | Forward                | tcccactctccaccttctga                 |
|                             | Reverse                | agttggatagggcctctctg                 |
| Mouse Nrf2                  | Forward                | atgatggactggagittgccaccgaggga        |
|                             | Reverse                | ggaaacaaggaacacattgccatctctgggt      |
| Human CRE (EMSA)            | Forward                | gtgcagctgcatttctgctgctcatggt         |
|                             | Reverse                | aacatgacgcagcagaatgcagctgcac         |
| Human CRE mutant (EMSA)     | Forward                | gcagctgcatttctatcatgctggtggagg       |
|                             | Reverse                | cctccaacaatgacatgatagaatgcagctgc     |
| Human NF-E2/AP-1 (EMSA)     | Forward                | gctagatttctgagtcaccagtcctcctcagc     |
|                             | Reverse                | gctgaggagcactggtgactcagcaaatctagc    |
| Human proximal E-box (EMSA) | Forward                | ctgtccgctggcccacgtgaccccgaggacataa   |
|                             | Reverse                | ttatgctcggcgggtcagtgggccaggcgggaacag |
| Sph1 3C                     | Int Forward            | gctaataagagctgcacgatggttggga         |
|                             | Int Reverse            | gcctaataatcacacagctcacccgg           |
|                             | 1R                     | gcctcctgggttcaagcgatt                |
|                             | 3R                     | ccagttcctggaatagtgctgg               |
|                             | 2F                     | ccagcaggaggagagagaatagca             |
| 4F                          | cgaggtgtttggagttgctctc |                                      |

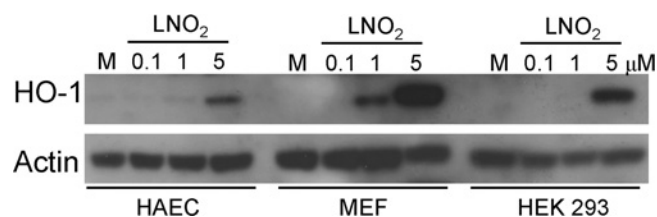

**Figure S1 LNO<sub>2</sub> induces HO-1 protein in HAEC, MEF and HEK-293 cells**

HAEC, wild-type MEF and HEK-293 cells were treated with vehicle (MeOH; methanol) or 0.1, 1 and 5 μM LNO<sub>2</sub> for 16 h, and analysed for HO-1 and actin (loading control) expression by Western blot analysis.

<sup>1</sup> To whom correspondence should be addressed (email agarwal@uab.edu).
